# Supplementary material
Source: publisher site journal article supplement (https://www.dovepress.com/article/541269)

| Table S1. List of participating facilities and approval numbers at each facility | |
| --- | --- |
| facility | approval number |
| Nagoya University Graduate School of Medicine, Nagoya, Japan | 2022-0092 |
| Fujita Health University School of Medicine, Toyoake, Japan | HM22-405 |
| the Miyake Eye Clinic, Nagoya, Japan | 2022-003 |
| Kariya Toyota General Hospital, Japan | 790 |
| Nishio Municipal Hospital | 102 |
| Ichinomiya Municipal Hospital | 1329 |

| Table S2. List of the questionnaire items of the original Catquest-SF questionnaire, and the reverse translated sentences of the Japanese modified Catquest-9SF questionnaire into English | |
| --- | --- |
| Original Catquest-9SF questionaire | Reverse translated sentence into English |
| Q1. Do you find that your sight at present in some way causes you difficulty in your everyday life? | Q1. Do you think your recent vision has interfered with your daily life in any way? |
| Q2. Are you satisfied or dissatisfied with your sight at present? | Q2. Are you satisfied with your recent visibility? |
| Q3. Do you have difficulty with the following activities because of your sight? If so, to what extent? | Q3. Do you have any difficulty in seeing to perform any of the following seven activities? |
| Q3-1. Reading text in newspapers | Q3_1. Read articles in newspapers (magazines, etc.). |
| Q3-2. Recognising the faces of people you meet | Q3_2. Recognize the other person's face (at intervals of about standing around talking) |
| Q3-3. Seeing the prices of goods when shopping | Q3_3. Read prices and labels on food and other items while shopping. |
| Q3-4. Seeing to walk on uneven surfaces, e.g. cobblestones | Q3_4. Walking on bumpy roads (e.g., cobblestones) |
| Q3-5. Seeing to do handicrafts, woodwork etc. | Q3_5. Do handicrafts and needlework |
| Q3-6. Reeding subtitles on TV | Q3_6. Watching subtitles and tickers on TV |
| Q3-7. Seeing to engage in an activity/hobby that are interested in | Q3_7. Enjoying hobbies and looking at things close to you, such as card games, looking at pictures, etc. |
| Reverse translation applied DeepL translation (https://www.deepl.com/ja/translator) | |

| Supplemental Table 3. Comparison of preoperative background characteristics between high and low patient ability score groups when the Eyhance group was divided at the third quartile. | | | | |
| --- | --- | --- | --- | --- |
|  |
| Characteristic | Overall | high patient ability group | low patient ability group | p-value |  |
| n | 72 | 53 | 19 |  |  |
| age (year-old) | 70 | 71 | 69 | 0.336 |  |
| sex (female / male) | 38 / 34 | 26 / 27 | 12 / 7 | 0.422 |  |
| uncorrected distance visual acuity (logMAR) | 0.72 (0.41) | 0.70 (0.39) | 0.78 (0.46) | 0.551 |  |
| best-corrected distance visual acuity (logMAR) | 0.27 (0.27) | 0.25 (0.24) | 0.31 (0.36) | 0.490 |  |
| Sphere (diopter) | -1.3 (3.8) | -1.2 (3.2) | -1.8 (5.0) | 0.661 |  |
| Cylinder (diopter) | -0.72 (1.21) | -0.78 (1.04) | -0.56 (1.61) | 0.610 |  |
| corneal astigmatism (diopter) | -0.74 (0.40) | -0.74 (0.39) | -0.76 (0.42) | 0.818 |  |
| pupil size (mm) | 3.15 (0.72) | 3.22 (0.75) | 2.96 (0.60) | 0.134 |  |
| intraocular pressure (mmHg) | 14.57 (2.93) | 14.34 (2.90) | 15.18 (3.01) | 0.299 |  |
| central macular thickness (μm) | 397 (90) | 391 (87) | 414 (98) | 0.382 |  |
| Welch two sample t-test; Fisher's exact test |  |  |  |  |  |
| cutoff value for patient ability: -4.730 (third quartile of patient ability) | |  |  |  |  |


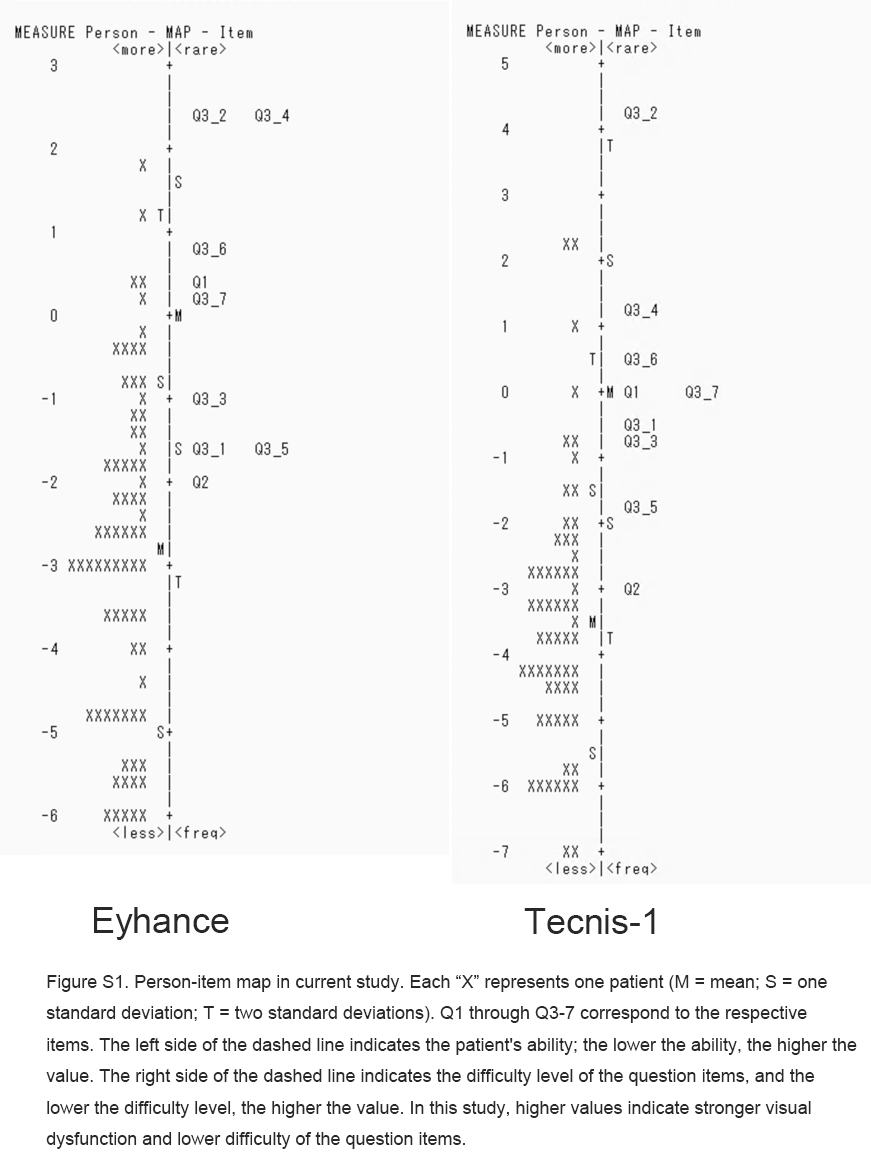

Supplement: Supplementary file 1 [file supplementary%20file_1.docx]
